# Supplementary material for: Ectopic clustering of Cajal–Retzius and subplate cells is an initial pathological feature in Pomgnt2-knockout mice, a model of dystroglycanopathy
Source: PubMed Central journal article supplement (PMC4461912; doi:10.1038/srep11163), 2015-06-10
Supplement: srep11163-s1.pdf [file srep11163-s1.pdf]

## Supplementary Information

### **Ectopic clustering of Cajal–Retzius and subplate cells is an initial pathological feature in *Pomgnt2*-knockout mice, a model of dystroglycanopathy**

Naoki Nakagawa<sup>1</sup>, Hirokazu Yagi<sup>2</sup>, Koichi Kato<sup>2,3</sup>, Hiromu Takematsu<sup>1</sup>, and Shogo Oka<sup>1</sup>

<sup>1</sup>Department of Biological Chemistry, Human Health Sciences, Graduate School of Medicine, Kyoto University, 53 Kawahara-cho, Shogoin, Sakyo-ku, Kyoto 606-8507, Japan; <sup>2</sup>Graduate School of Pharmaceutical Sciences, Nagoya City University, 3-1 Tanabe-dori, Mizuho-ku, Nagoya 467-8603, Japan; <sup>3</sup>Okazaki Institute for Integrative Bioscience and Institute for Molecular Science, National Institutes of Natural Sciences, 5-1 Higashiyama Myodaiji, Okazaki 444-8787, Japan.

**a**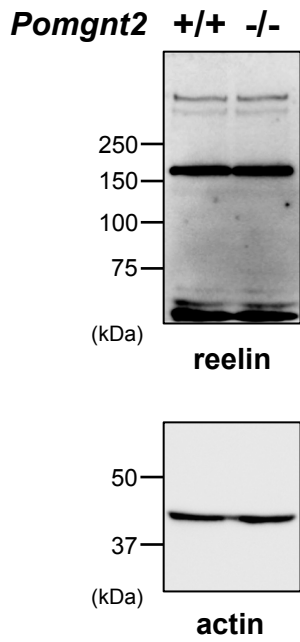**b**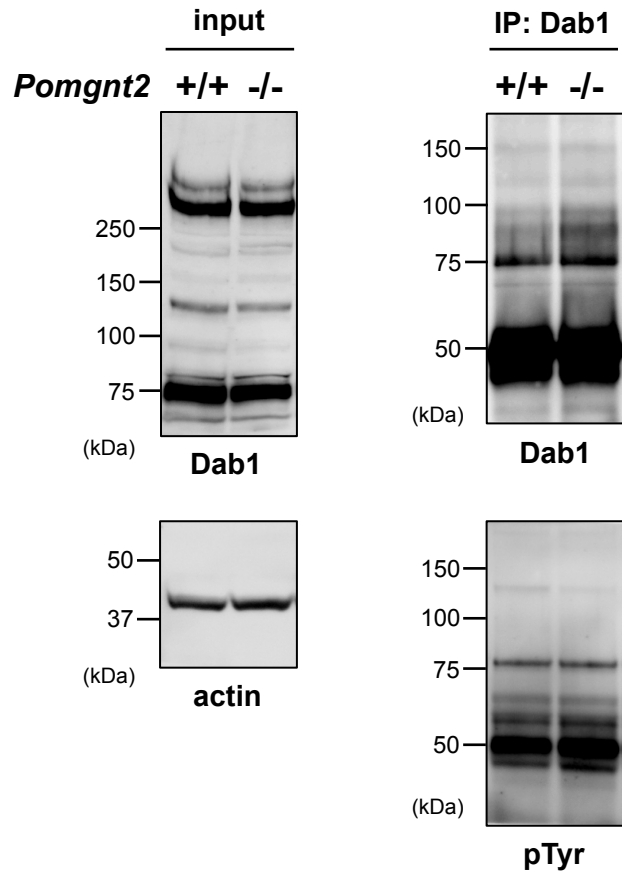**Fig. S1 | Full-length blots.**

The regions of interest are highlighted in main Figs: (a) Fig. 7a; (b) Fig. 7b.
